# Supplementary material for: Bacteria Associated with the Roots of Common Bean (Phaseolus vulgaris L.) at Different Development Stages: Diversity and Plant Growth Promotion
Source: MDPI journal article supplement (doi:10.3390/microorganisms11010057), 2022-12-24
Supplement: s1 [file s1]

| Genera                      | V1          |         |           | V2          |         |           | F           |         |           | P           |         |           | Total |
|-----------------------------|-------------|---------|-----------|-------------|---------|-----------|-------------|---------|-----------|-------------|---------|-----------|-------|
|                             | Nodules (N) | In (In) | Out (Out) | Nodules (N) | In (In) | Out (Out) | Nodules (N) | In (In) | Out (Out) | Nodules (N) | In (In) | Out (Out) |       |
| <i>Pseudomonas</i> sp.      | 2           | 2       | 5         | 4           | 5       | 2         | 3           | -       | 8         | 3           | 6       | 3         | 43    |
| <i>Enterobacter</i> sp.     | 4           | 4       | 7         | 1           | 5       | 3         | -           | 1       | 1         | -           | -       | -         | 26    |
| <i>Bacillus</i> sp.         | 2           | -       | 3         | -           | 1       | 1         | -           | 2       | 5         | -           | 6       | 4         | 24    |
| <i>Flavobacterium</i> sp.   | 3           | -       | 5         | 3           | 1       | 2         | 1           | 2       | 3         | -           | -       | 2         | 22    |
| <i>Priestia</i> sp.         | -           | -       | 2         | 1           | -       | 1         | -           | 2       | 1         | -           | 5       | 2         | 14    |
| <i>Kosakonia</i> sp.        | -           | -       | -         | 2           | 6       | 2         | -           | -       | -         | -           | -       | -         | 10    |
| <i>Variovorax</i> sp.       | -           | 1       | -         | -           | -       | -         | 1           | 1       | -         | 1           | 2       | 2         | 8     |
| <i>Delftia</i> sp.          | -           | 2       | -         | -           | 1       | 2         | -           | -       | 2         | -           | -       | -         | 7     |
| <i>Achromobacter</i> sp.    | -           | 1       | -         | -           | 1       | -         | 2           | -       | -         | -           | 1       | -         | 5     |
| <i>Chitinophaga</i> sp.     | -           | -       | -         | -           | 1       | 1         | 1           | 1       | -         | -           | -       | -         | 4     |
| <i>Microbacterium</i> sp.   | -           | -       | -         | -           | -       | -         | -           | -       | -         | -           | 2       | 2         | 4     |
| <i>Rhizobium</i> sp.        | -           | -       | -         | 2           | -       | -         | -           | -       | -         | -           | -       | 1         | 3     |
| <i>Leclercia</i> sp.        | 1           | 1       | 1         | -           | -       | -         | -           | -       | -         | -           | -       | -         | 3     |
| <i>Curtobacterium</i> sp.   | -           | -       | -         | -           | -       | 2         | -           | -       | -         | -           | -       | -         | 2     |
| <i>Stenotrophomonas</i> sp. | -           | 1       | 1         | -           | -       | -         | -           | -       | -         | -           | -       | -         | 2     |
| <i>Mucilaginobacter</i> sp. | -           | -       | -         | -           | -       | -         | -           | -       | 1         | 1           | -       | -         | 2     |
| <i>Flexibacter</i> sp.      | -           | -       | -         | -           | 1       | -         | -           | -       | -         | -           | -       | -         | 1     |
| <i>Azospirillum</i> sp.     | -           | -       | -         | -           | -       | 1         | -           | -       | -         | -           | -       | -         | 1     |
| <i>Trinickia</i> sp.        | -           | -       | -         | -           | -       | 1         | -           | -       | -         | -           | -       | -         | 1     |
| <i>Cronobacter</i> sp.      | -           | -       | -         | -           | -       | 1         | -           | -       | -         | -           | -       | -         | 1     |
| <i>Pantoea</i> sp.          | 1           | -       | -         | -           | -       | -         | -           | -       | -         | -           | -       | -         | 1     |
| <i>Klebsiella</i> sp.       | 1           | -       | -         | -           | -       | -         | -           | -       | -         | -           | -       | -         | 1     |
| <i>Acidovorax</i> sp.       | -           | -       | -         | -           | -       | -         | -           | -       | -         | 1           | -       | -         | 1     |
| <i>Cupriavidus</i> sp.      | -           | -       | -         | -           | -       | -         | -           | -       | -         | -           | 1       | -         | 1     |
| <i>Agrobacterium</i> sp.    | -           | -       | -         | -           | -       | -         | -           | -       | -         | -           | -       | 1         | 1     |
| <i>Paraburkholderia</i> sp. | -           | -       | -         | -           | -       | -         | -           | -       | -         | -           | -       | 1         | 1     |
| <b>Total</b>                | 14          | 12      | 24        | 13          | 22      | 19        | 8           | 9       | 21        | 6           | 23      | 18        | 189   |
